# Supplementary material
Source: PubMed Central journal article supplement (PMC6610016)
Supplement: DB180933SupplementaryData.pdf [file DB180933SupplementaryData.pdf]

## SUPPLEMENTARY DATA

Glyoxalase 1 enhances bone marrow progenitor cell therapy for wound healing in diabetic mice.

Hainan Li<sup>1</sup>, Megan O'Meara<sup>1</sup>, Xiang Zhang<sup>1</sup>, Kezhong Zhang<sup>2,3</sup>, Berhane Seyoum<sup>4</sup>, Zhengping Yi<sup>1,5</sup>, Randal J. Kaufman<sup>7</sup>, Terrence J. Monks<sup>1,5</sup>, Jie-Mei Wang<sup>1,2,6\*</sup>.

<sup>1</sup>Department of Pharmaceutical Sciences, Eugene Applebaum College of Pharmacy and Health Sciences;

<sup>2</sup>Center for Molecular Medicine and Genetics; <sup>3</sup>Department of Immunology and Microbiology;

<sup>4</sup>Division of Endocrinology, School of Medicine, <sup>5</sup>Integrated Biosciences; <sup>6</sup>Cardiovascular Research Institute; Wayne State University, Detroit, MI. <sup>7</sup>Degenerative Diseases Program, Sanford Burnham Prebys Medical Discovery Institute, La Jolla, CA.

Address correspondence to:

Jie-Mei Wang, MD PhD

Wayne State University

Eugene Applebaum College of Pharmacy and Health Sciences

Department of Pharmaceutical Sciences

259 Mack Ave, Suite 3122

Detroit, Michigan 48201

Tel: 313-577-1715

Email: [jiemei.wang@wayne.edu](mailto:jiemei.wang@wayne.edu)

SUPPLEMENTARY DATA

**Supplementary Figure S1. Immunofluorescent staining of IRE1 $\alpha$  and CD31 of aortas from IRE1<sup>ECKO</sup> and IRE1<sup>flox/flox</sup> mice.** White arrows indicate IRE1 $\alpha$  in endothelium of aorta isolated from IRE1<sup>flox/flox</sup> mice. Bar = 200  $\mu$ m.

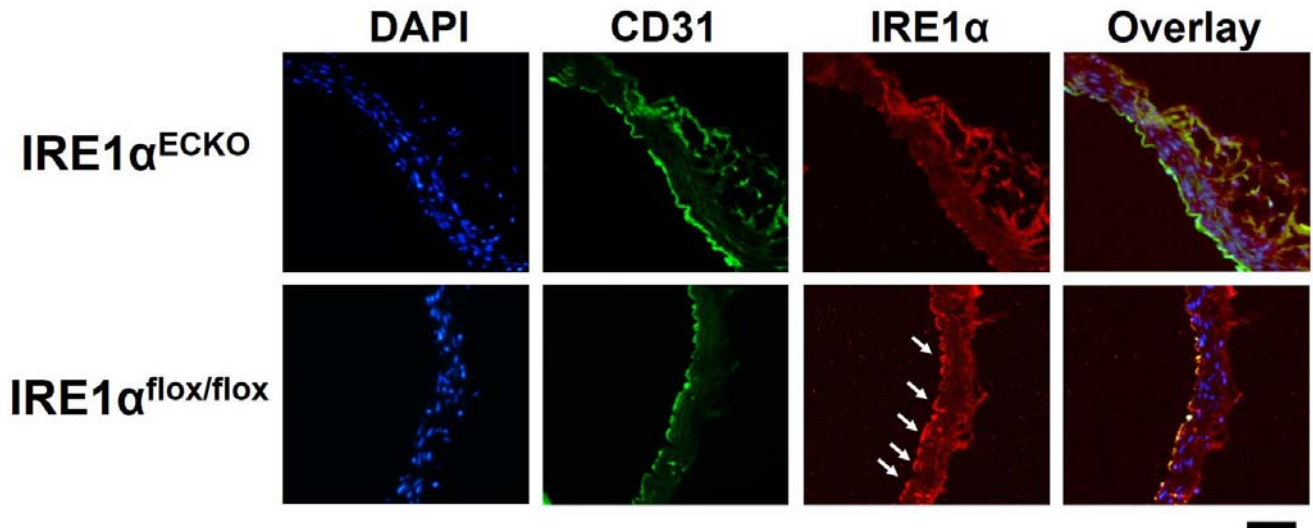

SUPPLEMENTARY DATA

**Supplementary Figure S2. Western blot analysis of GLO1 expression level in Ad-IRE1 $\alpha$  or Ad-GFP infected db/db BMPCs with 24 hours of MGO exposure.** BMPCs from db/+ mice were culture for 7 days then transfected with adenovirus carrying human IRE1 $\alpha$  (Ad-IRE1 $\alpha$ , 100 MOI, 48 hours) using adenovirus carrying egfp (Ad-GFP, 100 MOI, 48 hours) as controls. GLO1 protein level was analyzed by Western blot assay. n = 5 per group.

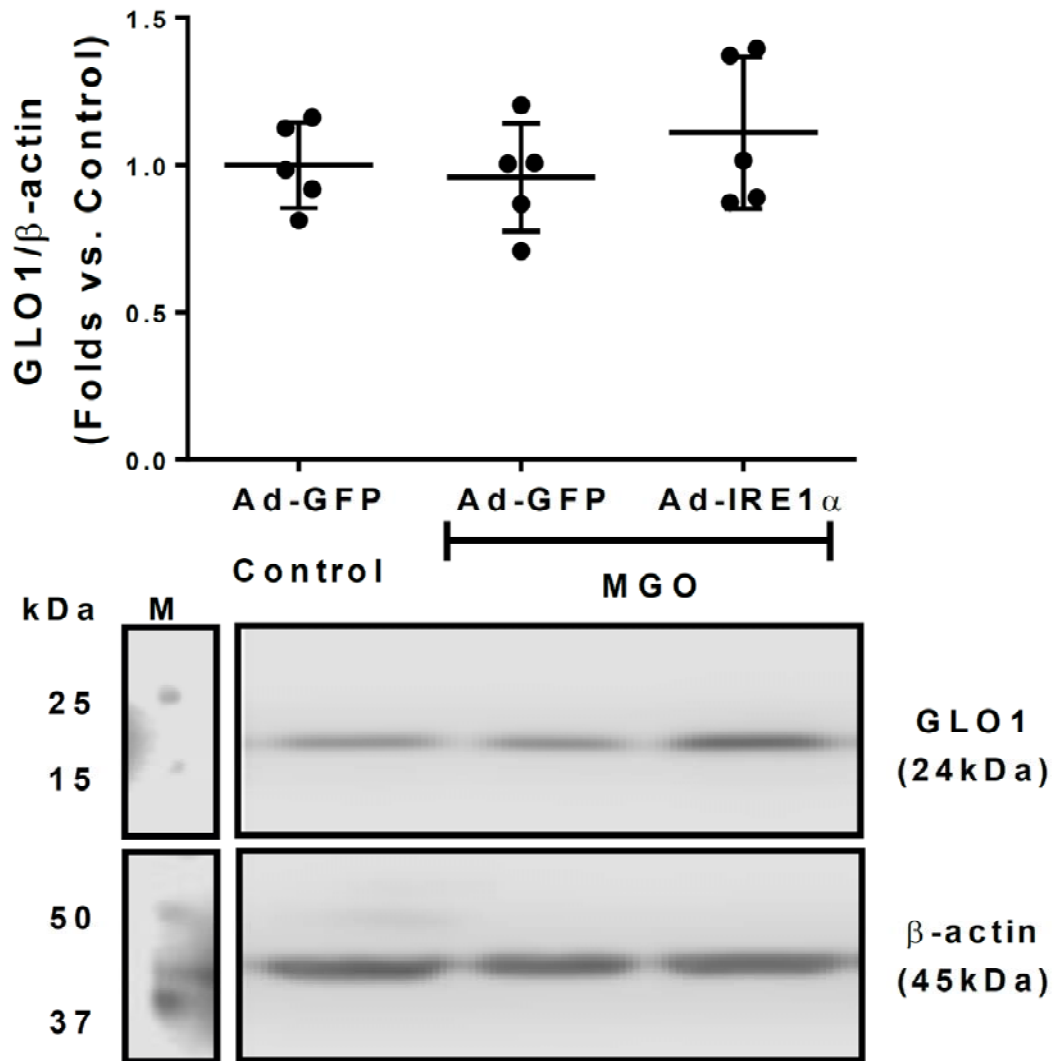

SUPPLEMENTARY DATA

**Supplementary Figure S3. Glyoxalase 1 (GLO1) expression level in bone marrow-derived progenitor cells (BMPCs) from db/+ mice did not change after MGO exposure.** BMPCs from db/+ mice were culture for 7 days then exposed to 10  $\mu$ M of MGO for 24 hours. GLO1 protein level was analyzed by Western blot assay, n = 5 per group.

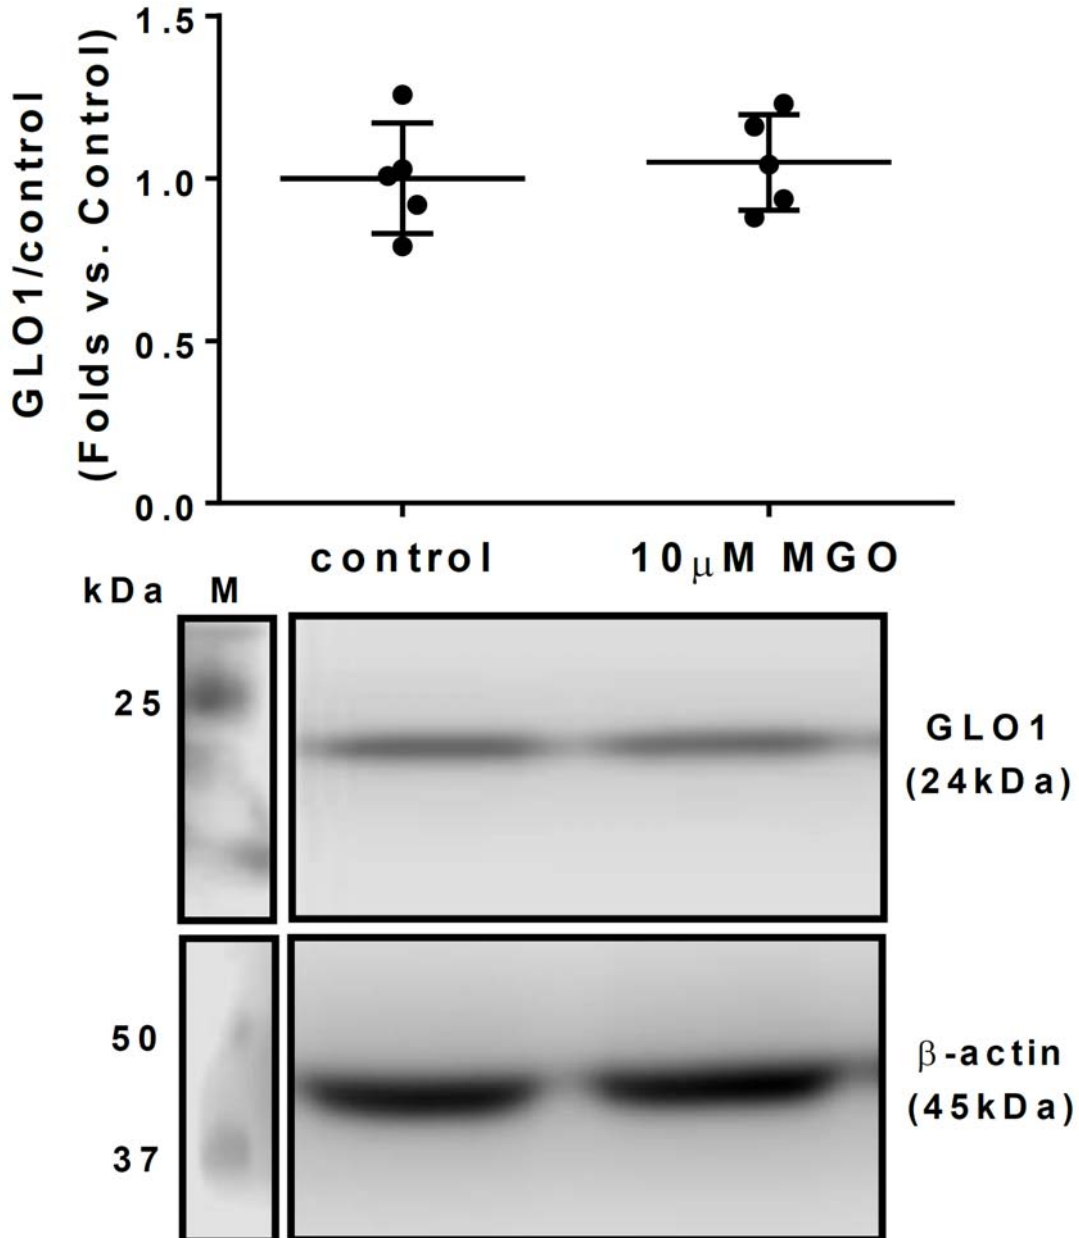

SUPPLEMENTARY DATA

**Supplementary Table S1. Key functional regions and potential MGO binding sites in human IRE1 $\alpha$ .**

| Feature Key   | Position | Description                                                   | Sequence                                |
|---------------|----------|---------------------------------------------------------------|-----------------------------------------|
| Binding site  | 599      | ATP binding                                                   | FDNRDVAV <b>KR</b>                      |
| Active site   | 688      | Proton acceptor                                               | SLNIVHR <b>DLK</b>                      |
| Binding site  | 577-585  | Nucleotide binding, ATP required                              | FCP <b>KDVLGHG</b><br><b>AEGTIVYRGM</b> |
| Mutagenesis   | 599      | K->A: Loss of autophosphorylation & endoribonuclease activity | FDNR <b>D</b> VAV <b>KR</b>             |
| Mutagenesis   | 907      | K->A: Loss of endoribonuclease activity                       | L <b>R</b> AMR <b>NKK</b> HH            |
| Modified site | 724-729  | Phosphorylation sites                                         | GH <b>SFSRR</b> SG                      |

**Red** AA: functional site; **highlighted** AA: potential MGO binding position.

SUPPLEMENTARY DATA

**Supplementary Table S2. Clinical and biochemical characteristics in lean healthy subjects, obese subjects and type 2 diabetic patients.**

| Characteristics           | Lean healthy (LH)           | Type 2 diabetes (T2D)        |
|---------------------------|-----------------------------|------------------------------|
| Age (years)               | 25 ± 2.70                   | 61.5 ± 3.54                  |
| Gender (Male/Female)      | 3/1                         | 1/1                          |
| BMI (kg/cm <sup>2</sup> ) | 21.20 ± 2.24                | 24.65 ± 1.54                 |
| Fasting glucose (mg/dl)   | 86.95 ± 7.28                | 161.85 ± 85.05               |
| OGTT (2h, mg/dl)          | 92.60 ± 21.06               | 215 ± 29.62                  |
| HbA1c (%) (mmol/mol)      | 5.4% (36mmol/mol)<br>± 0.20 | 7.90% (63mmol/mol) ±<br>3.11 |

Abbreviation: BMI - body mass index. OGTT - oral Glucose Tolerance Test. Values are percentages or mean ± SD

## SUPPLEMENTARY DATA

### References

1. Zhang K, Wang S, Malhotra J, Hassler JR, Back SH, Wang G, Chang L, Xu W, Miao H, Leonardi R, Chen YE, Jackowski S, Kaufman RJ: The unfolded protein response transducer IRE1 $\alpha$  prevents ER stress-induced hepatic steatosis. *The EMBO Journal* 2011;30:1357-1375
2. Wang JM, Qiu Y, Yang ZQ, Li L, Zhang K: Inositol-Requiring Enzyme 1 Facilitates Diabetic Wound Healing Through Modulating MicroRNAs. *Diabetes* 2017;66:177-192
3. Li H, Liu J, Wang Y, Fu Z, Huttemann M, Monks TJ, Chen AF, Wang J-M: MiR-27b augments bone marrow progenitor cell survival via suppressing the mitochondrial apoptotic pathway in type 2 diabetes. *American Journal of Physiology - Endocrinology And Metabolism* 2017;
4. Dhar A, Dhar I, Desai KM, Wu L: Methylglyoxal scavengers attenuate endothelial dysfunction induced by methylglyoxal and high concentrations of glucose. *Br J Pharmacol* 2010;161:1843-1856
5. Chen J, Song M, Yu S, Gao P, Yu Y, Wang H, Huang L: Advanced glycation endproducts alter functions and promote apoptosis in endothelial progenitor cells through receptor for advanced glycation endproducts mediate overexpression of cell oxidant stress. *Mol Cell Biochem* 2010;335:137-146
6. Kinsky OR, Hargraves TL, Anumol T, Jacobsen NE, Dai J, Snyder SA, Monks TJ, Lau SS: Metformin Scavenges Methylglyoxal To Form a Novel Imidazolinone Metabolite in Humans. *Chem Res Toxicol* 2016;29:227-234
7. Wang JM, Tao J, Chen DD, Cai JJ, Irani K, Wang Q, Yuan H, Chen AF: MicroRNA miR-27b rescues bone marrow-derived angiogenic cell function and accelerates wound healing in type 2 diabetes mellitus. *Arteriosclerosis, thrombosis, and vascular biology* 2014;34:99-109
8. Xue M, Weickert MO, Qureshi S, Kandala NB, Anwar A, Waldron M, Shafie A, Messenger D, Fowler M, Jenkins G, Rabbani N, Thornalley PJ: Improved Glycemic Control and Vascular Function in Overweight and Obese Subjects by Glyoxalase 1 Inducer Formulation. *Diabetes* 2016;65:2282-2294
